# Supplementary material for: Identification of transcriptome-wide, nut weight-associated SNPs in Castanea crenata
Source: PubMed Central journal article supplement (PMC6739505; doi:10.1038/s41598-019-49618-8), 2019-09-11
Supplement: 41598_2019_49618_MOESM1_ESM.pdf [file 41598_2019_49618_MOESM1_ESM.pdf]

SUPPLEMENTARY INFORMATION

**Identification of transcriptome-wide, nut weight-associated SNPs in *Castanea crenata***

Min-Jeong Kang<sup>1†</sup>, Ah-Young Shin<sup>2†</sup>, Younhee Shin<sup>3,4†</sup>, Sang-A Lee<sup>1</sup>, Hyo-Ryeon Lee<sup>1</sup>, Tae-Dong Kim<sup>1</sup>, Mina Choi<sup>5</sup>, Namjin Koo<sup>6</sup>, Yong-Min Kim<sup>6</sup>, Dongsoo Kyeong<sup>3,7</sup>,  
Sathiyamoorthy Subramaniam<sup>3</sup> and Eung-Jun Park<sup>1\*</sup>

(a)

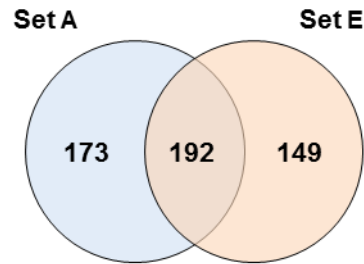

(b)

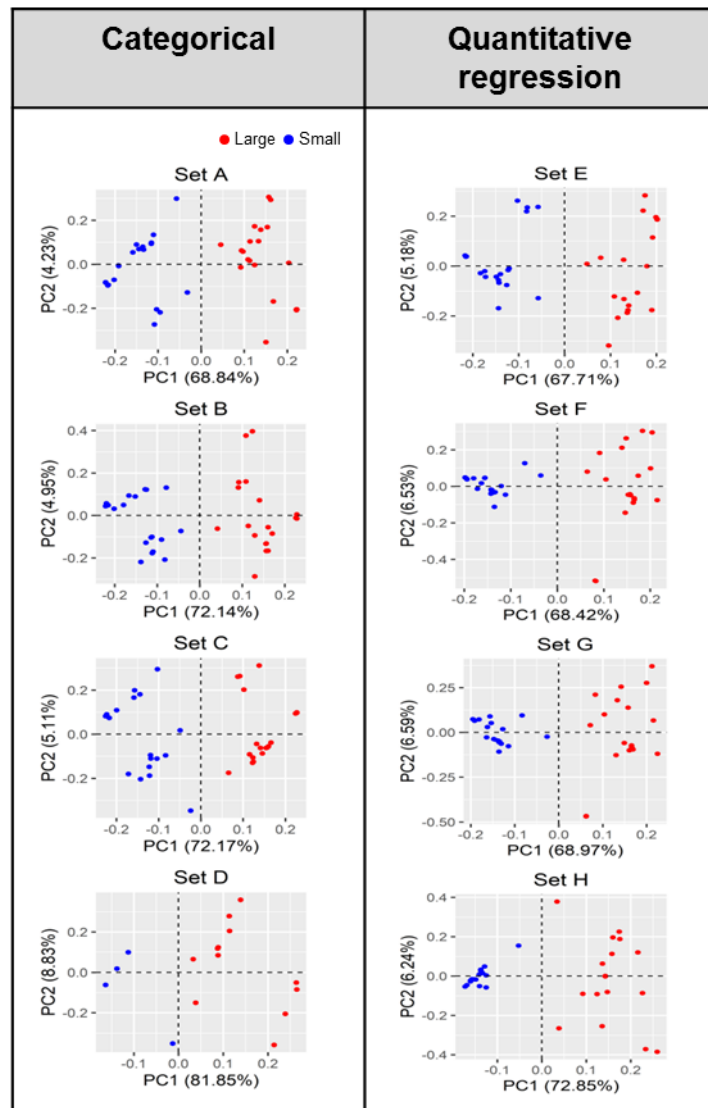

**Supplementary Figure S1.** SNP selection and clustering by either categorical or quantitative regression mode. (a) Venn diagram shows the number of SNPs in categorical data and quantitative data with  $FDR < 0.05$ . (b) Principal component analysis (PCA) showing important SNPs in large (red) and small population (blue). SNPs with different FDR levels ( $FDR < 0.05$ , 0.01, 0.005 and 0.001) are divided into eight sets of subgroups. Set A to D are classified as the categorical mode and Set E to H are categorized by quantitative regression mode.

**Supplementary Table S1.** List of chestnut accessions for the training sets (n=42).

| No. | Name             | Nut weight (g/FW) |
|-----|------------------|-------------------|
| L1  | Chukwang         | 39.4 ± 3.1        |
| L2  | Amsu 2           | 36.2 ± 2.7        |
| L3  | Jangpyung        | 35.6 ± 4.2        |
| L4  | GwangyangB(GY-2) | 31.7 ± 3.8        |
| L5  | Sangpi           | 31.4 ± 3.4        |
| L6  | Daehan           | 29.1 ± 2.5        |
| L7  | Seomyeongsa 4    | 28.2 ± 2.7        |
| L8  | Gongju 1         | 28.1 ± 3.3        |
| L9  | Mipung           | 27.3 ± 2.6        |
| L10 | Jinju 2          | 27.3 ± 2.8        |
| L11 | Seomyeongsa      | 27.2 ± 2.3        |
| L12 | Dongnong 3       | 27.0 ± 2.1        |
| L13 | Soposi 2         | 27.0 ± 2.1        |
| L14 | Seomyeongsa 2    | 26.8 ± 2.3        |
| L15 | Gyeongje         | 26.7 ± 2.4        |
| L16 | Gwangdeok        | 26.7 ± 3.0        |
| L17 | Jeongwol         | 26.7 ± 2.1        |
| L18 | Joyul            | 26.6 ± 3.0        |
| L19 | Deokmyeong       | 26.5 ± 2.4        |
| L20 | Janggwangsa      | 25.7 ± 1.6        |
| L21 | Burim            | 25.2 ± 3.7        |
| S1  | Maepyeongjosaeng | 14.2 ± 2.3        |
| S2  | Kurakataamaguri  | 13.5 ± 1.9        |
| S3  | Kwangjujoyul     | 13.2 ± 1.7        |
| S4  | Pungeun          | 13.1 ± 1.4        |
| S5  | Gwangju 2        | 13.0 ± 1.4        |
| S6  | Daejeonyul       | 12.8 ± 2.1        |
| S7  | Ilyachun         | 12.8 ± 2.0        |
| S8  | Gwangju 3        | 12.6 ± 1.7        |
| S9  | Jinju 1          | 11.8 ± 2.2        |
| S10 | Toyotamawase     | 11.3 ± 2.5        |
| S11 | Ogbijosaeng      | 11.0 ± 1.7        |
| S12 | Ibwon 1          | 10.7 ± 1.5        |
| S13 | Bukgwan          | 10.6 ± 1.6        |
| S14 | Bangsa           | 10.3 ± 1.4        |
| S15 | Osibpa           | 8.9 ± 1.5         |
| S16 | Sangmyeon 1      | 8.8 ± 1.7         |
| S17 | Panyul           | 7.0 ± 1.6         |
| S18 | Amsu 3           | 8.9 ± 1.7         |
| S19 | Sohwagwang       | 5.4 ± 1.1         |
| S20 | Jangwon          | 8.8 ± 2.0         |
| S21 | Hamjongyul       | 4.8 ± 0.8         |

**Supplementary Table S2.** List of chestnut accessions for the validation sets (n=46).

| No.  | Name          | Nut weight (g/FW) |
|------|---------------|-------------------|
| VP1  | Jeongseon 13  | 7.5 ± 1.7         |
| VP2  | Gurye 15      | 7.8 ± 1.7         |
| VP3  | Hadong 13     | 8.1 ± 1.2         |
| VP4  | Hongchun 18   | 9.2 ± 2.3         |
| VP5  | Yanggu 8      | 10.0 ± 2.6        |
| VP6  | Gurye 1       | 10.1 ± 1.6        |
| VP7  | Macheon 2     | 10.1 ± 1.2        |
| VP8  | Hongchun 23   | 10.3 ± 1.7        |
| VP9  | Gurye 9       | 10.4 ± 1.8        |
| VP10 | Hadong 9      | 10.4 ± 1.1        |
| VP11 | Gangneung 7   | 10.6 ± 2.4        |
| VP12 | Jeongseon 11  | 10.8 ± 1.5        |
| VP13 | Gwacheon 1    | 10.9 ± 2.2        |
| VP14 | Uljin 2       | 10.9 ± 1.6        |
| VP15 | Gurye 8       | 11.0 ± 1.8        |
| VP16 | Uljin 10      | 11.1 ± 2.6        |
| VP17 | Uljin 12      | 11.7 ± 2.3        |
| VP18 | Jeongseon 10  | 12.2 ± 2.1        |
| VP19 | Hongchun 16   | 12.3 ± 1.8        |
| VP20 | Uljin 11      | 13.0 ± 2.7        |
| VP21 | Gangneung 4   | 13.1 ± 2.4        |
| VP22 | Hyeonri 1     | 13.7 ± 1.9        |
| VP23 | Hongchun 22   | 14.2 ± 1.9        |
| VP24 | Parkmi1       | 14.8 ± 2.0        |
| VP25 | Gwacheon 5    | 15.1 ± 2.4        |
| VP26 | Juok          | 16.4 ± 2.1        |
| VP27 | Akok          | 17.0 ± 3.3        |
| VP28 | Parkmi2       | 18.6 ± 2.7        |
| VP29 | Arima         | 19.1 ± 1.6        |
| VP30 | Daekukjosaeng | 19.2 ± 2.5        |
| VP31 | Pyeonggi      | 19.2 ± 1.6        |
| VP32 | Hwacheon 12   | 19.7 ± 2.4        |
| VP33 | Ishizuchi     | 19.9 ± 2.3        |
| VP34 | Kwangeun      | 20.1 ± 2.3        |
| VP35 | Saeil         | 20.1 ± 2.2        |
| VP36 | Kunumi        | 20.5 ± 1.8        |
| VP37 | Daebo         | 20.5 ± 3.0        |
| VP38 | Riheiguri     | 20.9 ± 2.3        |
| VP39 | Sinyipyeong   | 21.3 ± 2.6        |
| VP40 | Euljong       | 21.3 ± 1.4        |
| VP41 | Sanyayul      | 22.0 ± 2.1        |
| VP42 | Daesan        | 22.3 ± 1.8        |
| VP43 | Sinmyeong     | 22.5 ± 2.2        |
| VP44 | Isseumo       | 22.7 ± 1.4        |
| VP45 | Mansung       | 24.5 ± 1.5        |
| VP46 | Sansung       | 25.0 ± 2.1        |

**Supplementary Table S3.** Statistics for RNA sequencing reads of 42 chestnut accessions.

| <b>No.</b>     | <b>Raw reads</b>     | <b>Clean reads</b>   | <b>Mapped reads</b>  | <b>Mapped rates, %</b> | <b>Uniquely Mapped</b> | <b>Uniquely Mapped rates, %</b> |
|----------------|----------------------|----------------------|----------------------|------------------------|------------------------|---------------------------------|
| L1             | 48,841,916           | 47,663,124           | 40,650,685           | 85.3%                  | 40,084,476             | 84.1%                           |
| L2             | 49,310,972           | 48,167,224           | 40,275,367           | 83.6%                  | 39,555,842             | 82.1%                           |
| L3             | 47,616,934           | 46,520,440           | 38,967,889           | 83.8%                  | 38,361,701             | 82.5%                           |
| L4             | 53,272,746           | 52,104,368           | 43,233,170           | 83.0%                  | 42,596,760             | 81.8%                           |
| L5             | 55,760,734           | 54,517,952           | 44,280,886           | 81.2%                  | 43,461,181             | 79.7%                           |
| L6             | 51,846,260           | 50,621,734           | 42,120,320           | 83.2%                  | 41,536,554             | 82.1%                           |
| L7             | 51,698,758           | 50,513,032           | 41,186,844           | 81.5%                  | 40,579,554             | 80.3%                           |
| L8             | 49,651,938           | 48,507,026           | 39,919,039           | 82.3%                  | 39,319,743             | 81.1%                           |
| L9             | 51,543,716           | 50,452,886           | 42,936,826           | 85.1%                  | 42,245,341             | 83.7%                           |
| L10            | 50,752,022           | 49,735,726           | 42,535,223           | 85.5%                  | 41,917,283             | 84.3%                           |
| L11            | 53,782,130           | 52,629,460           | 45,283,822           | 86.0%                  | 44,601,416             | 84.7%                           |
| L12            | 48,325,820           | 47,417,790           | 40,507,523           | 85.4%                  | 39,924,109             | 84.2%                           |
| L13            | 53,262,948           | 52,197,208           | 44,598,191           | 85.4%                  | 43,941,952             | 84.2%                           |
| L14            | 53,482,532           | 52,490,370           | 44,709,100           | 85.2%                  | 44,042,479             | 83.9%                           |
| L15            | 49,556,680           | 48,509,878           | 41,364,052           | 85.3%                  | 40,722,520             | 83.9%                           |
| L16            | 45,626,906           | 44,667,782           | 37,977,722           | 85.0%                  | 37,340,660             | 83.6%                           |
| L17            | 49,331,210           | 48,420,698           | 41,498,833           | 85.7%                  | 40,858,456             | 84.4%                           |
| L18            | 49,708,030           | 48,785,850           | 41,650,082           | 85.4%                  | 41,038,262             | 84.1%                           |
| L19            | 64,199,482           | 62,715,698           | 51,390,338           | 81.9%                  | 50,576,799             | 80.6%                           |
| L20            | 64,379,290           | 63,005,606           | 51,606,777           | 81.9%                  | 50,788,884             | 80.6%                           |
| L21            | 55,103,178           | 53,868,564           | 44,577,771           | 82.8%                  | 43,937,699             | 81.6%                           |
| S1             | 68,272,514           | 66,545,142           | 54,555,186           | 82.0%                  | 53,782,844             | 80.8%                           |
| S2             | 49,780,434           | 48,791,820           | 42,449,449           | 87.0%                  | 41,843,291             | 85.8%                           |
| S3             | 49,258,168           | 48,351,102           | 40,854,717           | 84.5%                  | 40,298,809             | 83.3%                           |
| S4             | 46,068,500           | 44,982,314           | 37,771,134           | 84.0%                  | 37,158,974             | 82.6%                           |
| S5             | 47,085,510           | 45,914,510           | 38,744,537           | 84.4%                  | 38,146,570             | 83.1%                           |
| S6             | 49,725,380           | 48,575,056           | 41,613,207           | 85.7%                  | 40,876,955             | 84.2%                           |
| S7             | 47,323,602           | 46,299,622           | 41,226,730           | 89.0%                  | 40,616,896             | 87.7%                           |
| S8             | 56,555,836           | 55,277,040           | 45,861,031           | 83.0%                  | 45,180,798             | 81.7%                           |
| S9             | 47,267,300           | 46,069,434           | 39,199,357           | 85.1%                  | 38,597,507             | 83.8%                           |
| S10            | 52,922,200           | 51,497,478           | 42,704,883           | 82.9%                  | 42,091,926             | 81.7%                           |
| S11            | 49,442,904           | 48,173,102           | 40,967,703           | 85.0%                  | 40,332,933             | 83.7%                           |
| S12            | 52,740,360           | 51,154,260           | 42,257,023           | 82.6%                  | 41,526,099             | 81.2%                           |
| S13            | 58,180,294           | 56,665,716           | 47,620,763           | 84.0%                  | 46,748,217             | 82.5%                           |
| S14            | 53,615,946           | 52,018,984           | 45,645,455           | 87.7%                  | 44,948,724             | 86.4%                           |
| S15            | 55,588,454           | 53,901,256           | 45,681,894           | 84.8%                  | 44,844,423             | 83.2%                           |
| S16            | 60,970,642           | 59,170,680           | 50,940,847           | 86.1%                  | 50,063,928             | 84.6%                           |
| S17            | 58,491,110           | 56,859,432           | 47,875,365           | 84.2%                  | 46,873,694             | 82.4%                           |
| S18            | 47,219,808           | 45,899,368           | 37,788,767           | 82.3%                  | 37,245,371             | 81.1%                           |
| S19            | 52,675,528           | 51,155,564           | 42,758,934           | 83.6%                  | 42,122,563             | 82.3%                           |
| S20            | 46,664,890           | 45,460,286           | 38,148,392           | 83.9%                  | 37,625,401             | 82.8%                           |
| S21            | 51,286,982           | 50,009,964           | 43,775,974           | 87.5%                  | 43,093,135             | 86.2%                           |
| <b>Total</b>   | <b>2,198,190,564</b> | <b>2,146,284,546</b> | <b>1,809,711,808</b> |                        | <b>1,781,450,729</b>   |                                 |
| <b>Average</b> | <b>52,337,871</b>    | <b>51,102,013</b>    | <b>43,088,376</b>    | <b>84.4%</b>           | <b>42,415,494</b>      | <b>83.1%</b>                    |

**Supplementary Table S4.** Distribution of variant numbers in different types.

| <b>Types</b> | <b>Count</b> | <b>Percent</b> |
|--------------|--------------|----------------|
| EXON         | 217,133      | 33.5%          |
| INTRON       | 23,391       | 3.6%           |
| UTRs         | 407,865      | 62.9%          |

**Supplementary Table S5.** Performance of machine learning algorithms in training (n=42) and validation datasets (n=46). AUC, area under the ROC curve, SVM, support vector machines, KNN, k-nearest neural network, RF, random forest, PLS, partial least squares.

| Algorithm | Training sets (n=42) |             |             | Validation sets (n=46) |             |             |
|-----------|----------------------|-------------|-------------|------------------------|-------------|-------------|
|           | AUC                  | Sensitivity | Specificity | AUC                    | Sensitivity | Specificity |
| SVM       | 1                    | 0.95        | 1           | 0.62                   | 0.03        | 0.94        |
| KNN       | 1                    | 0.95        | 1           | 0.80                   | 0.45        | 0.84        |
| RF        | 1                    | 0.96        | 1           | 0.80                   | 0.55        | 0.81        |
| C5.0      | 0.94                 | 0.98        | 0.92        | 0.75                   | 0.42        | 0.86        |
| PLS       | 1                    | 0.95        | 1           | 0.78                   | 0.53        | 0.86        |

**Supplementary Table S6.** Performance of machine learning algorithms with SNPs from Set A to H in training datasets (n=42). AUC, Area under the ROC curve, SVM, support vector machines, KNN, k-nearest neural network, RF, random forest, PLS, partial least squares.

| Marker selection  | Set   | FDR   | Algorithm | AUC  | Sensitivity | Specificity |
|-------------------|-------|-------|-----------|------|-------------|-------------|
| Categorical mode  | Set A | 0.05  | C5.0      | 0.90 | 0.91        | 0.88        |
|                   |       |       | KNN       | 1    | 1           | 1           |
|                   |       |       | PLS       | 1    | 1           | 1           |
|                   |       |       | RF        | 1    | 1           | 1           |
|                   |       |       | SVM       | 1    | 0.99        | 1           |
|                   | Set B | 0.01  | C5.0      | 0.90 | 0.91        | 0.89        |
|                   |       |       | KNN       | 1    | 1           | 1           |
|                   |       |       | PLS       | 1    | 1           | 1           |
|                   |       |       | RF        | 1    | 1           | 1           |
|                   |       |       | SVM       | 1    | 0.99        | 1           |
|                   | Set C | 0.005 | C5.0      | 0.92 | 0.92        | 0.90        |
|                   |       |       | KNN       | 1    | 1           | 1           |
|                   |       |       | PLS       | 1    | 1           | 1           |
|                   |       |       | RF        | 1    | 1           | 1           |
|                   |       |       | SVM       | 1    | 1           | 1           |
|                   | Set D | 0.001 | C5.0      | 0.96 | 0.96        | 0.95        |
|                   |       |       | KNN       | 0.98 | 1           | 0.96        |
|                   |       |       | PLS       | 1    | 1           | 0.95        |
|                   |       |       | RF        | 1    | 1           | 0.96        |
|                   |       |       | SVM       | 1    | 0.99        | 0.94        |
| Quantitative mode | Set E | 0.05  | C5.0      | 0.91 | 0.91        | 0.90        |
|                   |       |       | KNN       | 1    | 1           | 1           |
|                   |       |       | PLS       | 1    | 1           | 1           |
|                   |       |       | RF        | 1    | 1           | 1           |
|                   |       |       | SVM       | 1    | 1           | 1           |
|                   | Set F | 0.01  | C5.0      | 0.91 | 0.91        | 0.90        |
|                   |       |       | KNN       | 1    | 1           | 1           |
|                   |       |       | PLS       | 1    | 1           | 1           |
|                   |       |       | RF        | 1    | 1           | 1           |
|                   |       |       | SVM       | 1    | 1           | 0.99        |
|                   | Set G | 0.005 | C5.0      | 0.92 | 0.94        | 0.90        |
|                   |       |       | KNN       | 1    | 1           | 1           |
|                   |       |       | PLS       | 1    | 1           | 1           |
|                   |       |       | RF        | 1    | 1           | 0.99        |
|                   |       |       | SVM       | 1    | 1           | 0.99        |
|                   | Set H | 0.001 | C5.0      | 0.93 | 0.95        | 0.90        |
|                   |       |       | KNN       | 1    | 1           | 1           |
|                   |       |       | PLS       | 1    | 1           | 1           |
|                   |       |       | RF        | 1    | 1           | 1           |
|                   |       |       | SVM       | 1    | 1           | 1           |



**Supplementary Table S7.** List of primer sequences used in Sanger sequencing.

| <b>Contig ID<br/>(Scaffold No : SNP Location)</b> | <b>Forward (5'-3')</b>    | <b>Reverse (5'-3')</b>  |
|---------------------------------------------------|---------------------------|-------------------------|
| scaffold01190:13428                               | TCTGGGCATGAACCATTCTACC    | TCGGATAGGGACTTGATGGTCT  |
| scaffold01019:66232                               | TTTTTGGTGTAGGGTTTGCTGG    | TACGACACCTCTTGAATTGGGG  |
| scaffold01019:66350                               | TTTTTGGTGTAGGGTTTGCTGG    | TACGACACCTCTTGAATTGGGG  |
| scaffold00551:8613                                | GCCCTCTTAATTGAGCCCTCTC    | TGTGAGTGTGCTGAACCTGAAT  |
| scaffold00859:85468                               | TGTTCCGATGGCTTGAAAAC TG   | CTCATGTGTGCAATGTGATCCC  |
| scaffold00485:18530                               | AGTGGGTCTTTGAAGAGGATGC    | TGCATCACAGGTATGGAGCAAT  |
| scaffold00406:56142                               | ACTGTGAACTCTGATTGGCTGT    | CTTCATGTACCCCCAGGACAAG  |
| scaffold00485:49474                               | AGTGGTCATGGGAGCTTCTCTA    | GGCCTTCATCCTATGATTGACAC |
| scaffold01190:53971                               | TCCAATGTTAGAACTGGCAGCT    | CGGGGTCGAATTTTACTTGTGG  |
| scaffold00406:46801                               | TGTCTATGAACAGTGATGTGATGCT | GTGCACTGAGTTTCTCTTGTGA  |
| scaffold00406:46909                               | TGTCTATGAACAGTGATGTGATGCT | TTATCTTGTAAGGTATCATCTG  |
| scaffold00485:2380                                | TCCTGTAGGCTGTCAGTCTCTTC   | ACACACAACACCAAATATACGG  |
| scaffold00491:55296                               | CCTCTGGCACTTCAATGAGGAT    | TGATGGTGTGCGAAGTGAGAAGG |
| scaffold00859:92916                               | TGGGTCTTGTTGCTTTGGGTAT    | GCAGTTCACGATTTTGTTCCT   |
| scaffold01019:57173                               | GTATCTGAAGGGAATCTGGATGG   | GGATCAGCTCCCGCAAATAGTA  |
| scaffold01019:57473                               | GTATCTGAAGGGAATCTGGATGG   | GGATCAGCTCCCGCAAATAGTA  |
| scaffold01019:66111                               | TTTTTGGTGTAGGGTTTGCTGG    | TACGACACCTCTTGAATTGGGG  |
| scaffold01190:53970                               | TCCAATGTTAGAACTGGCAGCT    | CGGGGTCGAATTTTACTTGTGG  |
| scaffold00485:53410                               | CCAATGGTTCCAAAAAGAGACT    | CAGTGGCAAAGGATTCAACTGG  |
| scaffold00551:85919                               | ATTTAAGAAGTGGCGGATGGGT    | GCTTCAGGCCCTTTGGTTAATC  |
| scaffold00551:98229                               | GAGTTGCATCCCACGTTTTTCA    | GAAGGAAAACAGAGTGGTGTGC  |

**Supplementary Table S8.** Genotyping by Sanger sequencing with 21 SNPs on 46 validation datasets.

| Major/<br>minor | G/T   | A/G   | G/A   | G/A  | C/T   | C/T   | C/T   | T/C   | G/A   | C/T   | G/C   | A/G  | T/A   | A/T   | A/G   | G/A   | T/C   | G/A   | T/C   | C/T   | A/G   |
|-----------------|-------|-------|-------|------|-------|-------|-------|-------|-------|-------|-------|------|-------|-------|-------|-------|-------|-------|-------|-------|-------|
| ID<br>No.       | 13428 | 66232 | 66350 | 8613 | 85468 | 18530 | 56142 | 49474 | 53971 | 46801 | 46909 | 2380 | 55296 | 92916 | 57173 | 57473 | 66111 | 53970 | 53410 | 85919 | 98229 |
| VP1             | G     | A     | G     | G    | C     | C     | C     | T     | G     | C/T   | G     | A    | T     | A     | A     | G     | T     | G     | T     | C     | A     |
| VP2             | G     | A     | G     | G    | C     | C     | C     | T     | G     | C     | G     | A    | T     | A     | A     | G     | T     | G     | T     | C     | A     |
| VP3             | G     | A     | G/A   | G    | C     | C     | C     | T     | G     | C     | G     | A    | T     | A     | A     | G     | T     | G     | T     | C     | A     |
| VP4             | G     | A     | G     | G    | C     | C     | C     | T     | G     | C     | G     | A    | T     | A     | A     | G     | T     | G     | T     | C     | A     |
| VP5             | G     | A     | G     | G    | C     | C     | C/T   | T     | G     | C/T   | G/C   | G    | T     | A     | A     | G     | T     | G     | T     | C     | A     |
| VP6             | T/G   | A     | G     | G/A  | C     | C/T   | C/T   | T/C   | G/A   | C/T   | G/C   | A/G  | A/T   | A/T   | A     | G     | T     | G/A   | T/C   | C/T   | A/G   |
| VP7             | T/G   | A     | G     | G/A  | C/T   | C     | C/T   | T     | G/A   | C/T   | G     | A    | T     | A     | A/G   | G/A   | T     | G/A   | T     | C     | A     |
| VP8             | G     | A     | G     | G    | C     | C     | C     | T     | G     | C     | G     | A    | T     | A     | A     | G     | T     | G     | T     | C     | A     |
| VP9             | G     | A     | G     | G    | C     | C/T   | C     | T     | G     | C     | G/C   | A    | T     | A     | A     | G     | T     | G     | T     | C     | A     |
| VP10            | G     | A     | G     | G    | C     | C     | C     | T     | G     | C     | G     | A    | T     | A     | A     | G     | T     | G     | T     | C     | A     |
| VP11            | G     | A/G   | G/A   | G/A  | C     | C     | C     | T/C   | G     | C     | G     | A    | T     | A     | A     | G     | C/T   | G     | T/C   | C     | A     |
| VP12            | G     | A     | G     | G    | C     | C     | C     | T     | G     | C     | G     | A    | T     | A     | A     | G     | T     | G     | T     | C     | A/G   |
| VP13            | G     | A/G   | G/A   | G    | C     | C     | C/T   | T     | G     | C     | G     | A    | T     | A     | A/G   | G/A   | C/T   | G     | T     | C     | A     |
| VP14            | G     | A     | G     | G    | C     | C     | C     | T     | G     | C     | G     | A    | T     | A     | A/G   | G     | T     | G     | T     | C     | A     |
| VP15            | G     | A     | G     | G    | C     | C     | C     | T     | G     | C     | G     | A    | T     | A     | A     | G     | T     | G     | T     | C     | A     |
| VP16            | G     | A     | G     | G    | C     | C     | C     | T     | G     | C     | G     | A    | T     | A     | A     | G     | T     | G     | T     | C     | A     |
| VP17            | G     | A     | G     | G    | C     | C/T   | C     | T     | G     | C     | G/C   | A    | T     | A     | A     | G     | T     | G     | T     | C     | A     |
| VP18            | T/G   | A/G   | G/A   | G    | C     | C/T   | C     | T/C   | G/A   | C/T   | G/C   | A    | T     | A     | A     | G/A   | C/T   | G/A   | T     | C/T   | A     |
| VP19            | G     | A     | G     | G    | C     | C     | C     | T     | G     | C     | G/C   | A    | T     | A     | A     | G     | T     | G     | T     | C     | A     |
| VP20            | G     | A/G   | G/A   | G    | C     | C     | C     | T     | G     | C     | G/C   | A    | T     | A     | A/G   | G/A   | C/T   | G     | T     | C     | A     |
| VP21            | G     | A     | G     | G    | C     | C     | C     | T     | G     | C/T   | G     | A    | T     | A     | A     | G     | T     | G     | T     | C     | A     |
| VP22            | G     | A     | G     | G    | C     | C     | C     | T     | G     | C     | G     | A    | T     | A     | A     | G     | T     | G     | T     | C     | A     |
| VP23            | G     | A     | G     | G    | C     | C     | C     | T     | G     | C     | G     | A    | T     | A     | A     | G     | T     | G     | T     | C     | A     |
| VP24            | G     | A     | G     | G    | C     | C     | C     | T     | G     | C     | G/C   | A    | T     | A     | A     | G     | T     | G     | T     | C     | A     |
| VP25            | G     | A     | G     | G    | C     | C     | C     | T     | G     | C/T   | G     | A    | T     | A     | A     | G/A   | T     | G     | T     | C     | A     |
| VP26            | T/G   | A/G   | G/A   | G/A  | C     | C     | C     | T     | G/A   | C     | G     | A    | T     | A     | A/G   | G/A   | C/T   | G/A   | T     | C/T   | A/G   |
| VP27            | G     | A     | G     | G    | C     | C     | C     | T     | G     | C     | G     | A    | T     | A/T   | A     | G     | T     | G     | T     | C     | A     |
| VP28            | T/G   | A     | G     | G/A  | C/T   | C/T   | C     | T/C   | G/A   | C     | G/C   | A/G  | A/T   | A/T   | A     | G     | T     | G/A   | T/C   | C/T   | A/G   |
| VP29            | T/G   | A/G   | G/A   | G/A  | C/T   | C/T   | C/T   | T/C   | G/A   | T     | G/C   | A/G  | A/T   | A/T   | A/G   | G/A   | C/T   | G/A   | T/C   | C/T   | A/G   |
| VP30            | G     | A/G   | G/A   | G    | C     | C     | C/T   | T/C   | G     | C/T   | G     | A    | T     | A     | A/G   | G/A   | C/T   | G     | T     | C     | A     |
| VP31            | G     | A     | G     | G/A  | C     | C     | C/T   | T/C   | G     | C/T   | G/C   | A    | T     | A     | A     | G/A   | T     | G     | T/C   | C     | A     |
| VP32            | T     | G     | A     | A    | C/T   | C/T   | C/T   | T/C   | A     | C/T   | G/C   | A/G  | A/T   | A/T   | G     | A     | C     | A     | T/C   | T     | A/G   |
| VP33            | T/G   | A     | G     | G/A  | C/T   | C/T   | C/T   | T/C   | G/A   | C/T   | G/C   | G    | A     | A/T   | A     | G     | T     | G/A   | T/C   | C/T   | A/G   |
| VP34            | G     | A/G   | G/A   | G    | C     | C     | C     | T     | G     | C     | G     | A/G  | A/T   | A/T   | A     | G     | C/T   | G     | C     | C/T   | A/G   |
| VP35            | G     | A     | G     | G    | C     | C     | C     | T     | G     | C     | G     | A/G  | T     | A     | G     | G     | T     | G     | T     | C/T   | A     |
| VP36            | T/G   | A     | G     | G/A  | C     | C     | C     | T/C   | G     | C/T   | G     | A/G  | A     | A/T   | A     | G     | T     | G     | T/C   | C/T   | A/G   |
| VP37            | T     | A/G   | G/A   | G/A  | C/T   | C/T   | T     | T/C   | A     | C/T   | G/C   | A/G  | A/T   | A/T   | A/G   | G/A   | C/T   | A     | T/C   | C/T   | A     |
| VP38            | T/G   | A     | G     | G/A  | C/T   | C/T   | C/T   | T/C   | G/A   | C/T   | G/C   | A/G  | A/T   | A/T   | A     | G     | T     | G/A   | T/C   | C/T   | A/G   |
| VP39            | G     | A     | G/A   | A    | C     | C     | C     | T     | G     | C     | G     | A    | T     | A     | A     | G     | T     | G     | T     | C     | A/G   |
| VP40            | T/G   | A/G   | G/A   | G/A  | C/T   | C/T   | C/T   | T/C   | G/A   | C/T   | G/C   | A/G  | A/T   | A/T   | A/G   | G/A   | C/T   | G/A   | T/C   | C/T   | A/G   |
| VP41            | T/G   | A     | G     | G/A  | C     | C/T   | C     | T/C   | G/A   | C     | G/C   | A/G  | A/T   | A/T   | A     | G     | T     | G/A   | T/C   | C/T   | A/G   |
| VP42            | T     | A/G   | G/A   | A    | C/T   | T     | T     | C     | A     | T     | C     | G    | A/T   | A/T   | A/G   | G/A   | C/T   | A     | C     | C/T   | G     |
| VP43            | T     | A     | G     | A    | C/T   | T     | C/T   | T/C   | A     | C/T   | C     | A    | A/T   | A/T   | A/G   | G/A   | T     | A     | T/C   | T     | G     |
| VP44            | T/G   | A     | G     | G/A  | C/T   | C/T   | C/T   | C     | G/A   | C     | G/C   | A/G  | A/T   | T     | A     | G     | T     | G/A   | T     | C/T   | G     |
| VP45            | T/G   | A/G   | G/A   | G/A  | C/T   | C/T   | C/T   | T/C   | G/A   | C/T   | G/C   | A/G  | T     | A/T   | A/G   | G/A   | C/T   | G/A   | T/C   | C/T   | A/G   |
| VP46            | G     | A     | G     | G/A  | C     | C     | C     | T     | G     | C/T   | G     | A    | T     | A     | A     | G     | T     | G     | T     | C     | A     |
